# Supplementary material for: Hepatocyte-specific CCAAT/enhancer binding protein α restricts liver fibrosis progression
Source: JCI journal article supplement (doi:10.1172/jci166731), 2024-03-31
Supplement: sd2 [file 2]

## **Original images for Blots**

### **Full western blot gel panels**

- (A) CEBPA p42 and p30 as well as TUBULIN from which the data in Figure 1E were derived.
- (B) CEBPA p42 and p30 as well as TUBULIN from which the data in Figure 1L were derived.
- (C) HES1 and TUBULIN from which the data in Figure S1M were derived.
- (D) HES1 and ACTB from which the data in Figure S1N were derived.
- (E) OPN and TUBULIN from which the data in Figure 4H were derived.
- (F) CEBPA p42 and p30, OPN and TUBULIN from which the data in Figure 5B were derived.
- (G) CEBPA p42 and p30, OPN and ACTB from which the data in Figure 5F were derived.
- (H) CEBPA p42 and p30 as well as TUBULIN from which the data in Figure S2B were derived.
- (I) CEBPA p42 and p30 as well as TUBULIN from which the data in Figure S4B were derived.
- (J) OPN and ACTB from which the data in Figure S5C were derived.
- (K) CEBPA p42 and TUBULIN from which the data in Figure S10A (left) were derived.
- (L) CEBPA p42 and TUBULIN from which the data in Figure S10A (right) were derived.
- (M) CEBPA p42 and TUBULIN from which the data in Figure S10F were derived.

**Red** encircled full blots, **Purple** encircled representative blots.

**A**

Human Livers

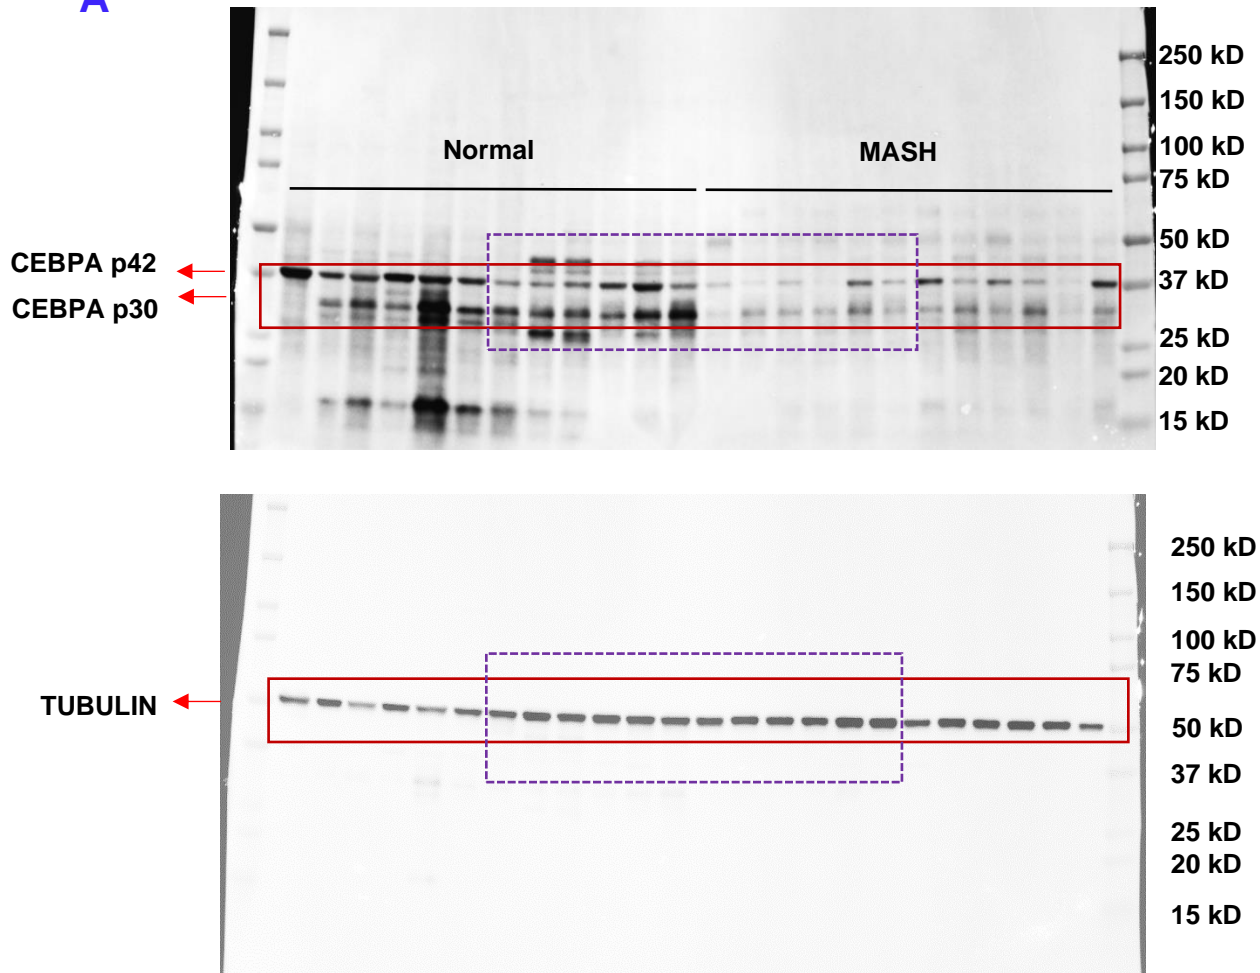

**B**

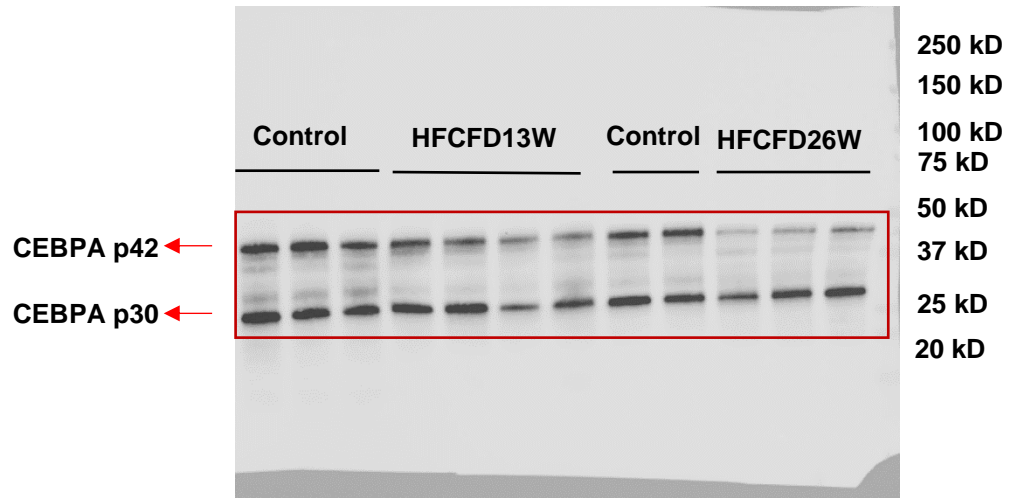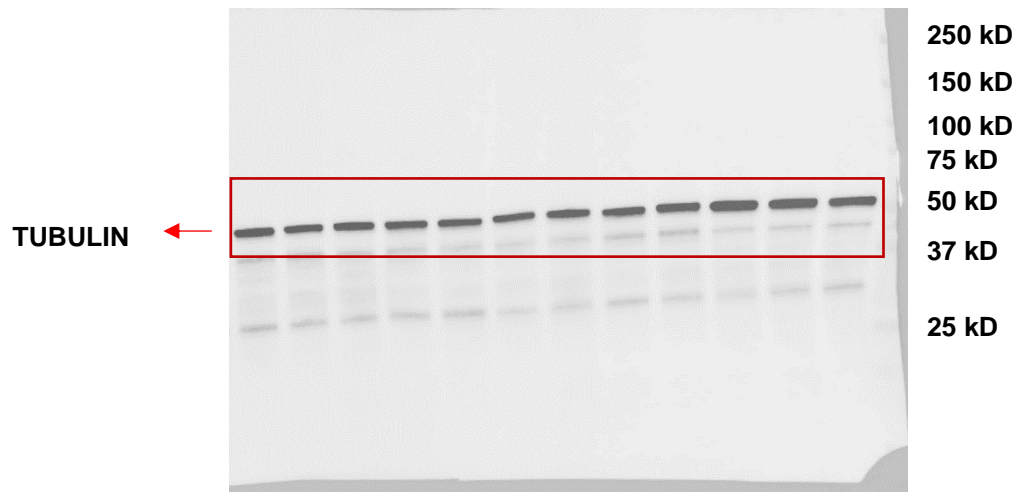

**C**

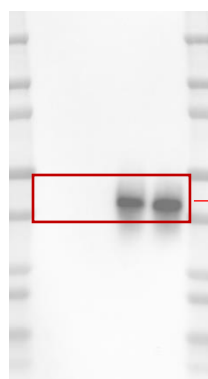

**Anti-FLAG  
(HES1)**

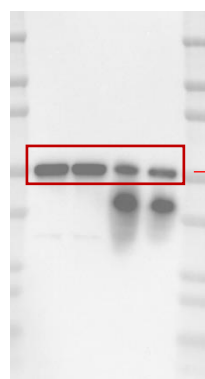

**TUBULIN**

**D**

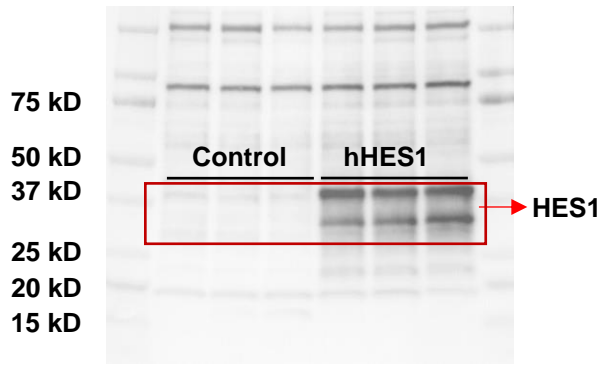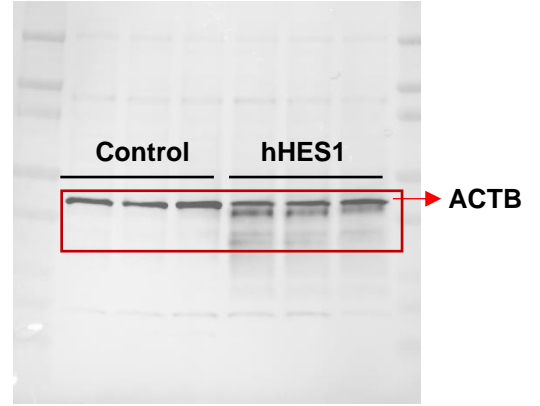

**Red** encircled full blots, **Purple** encircled representative blots.

**E**

Human Livers

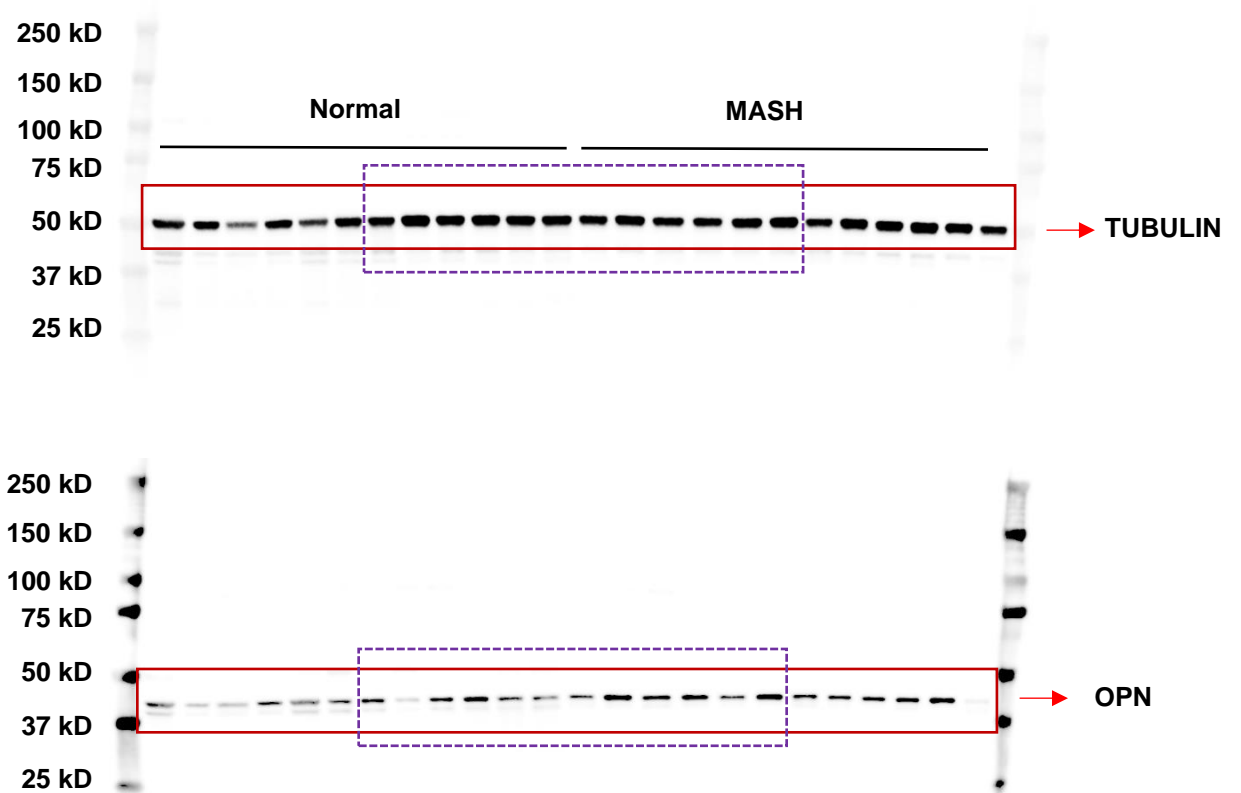

**F**

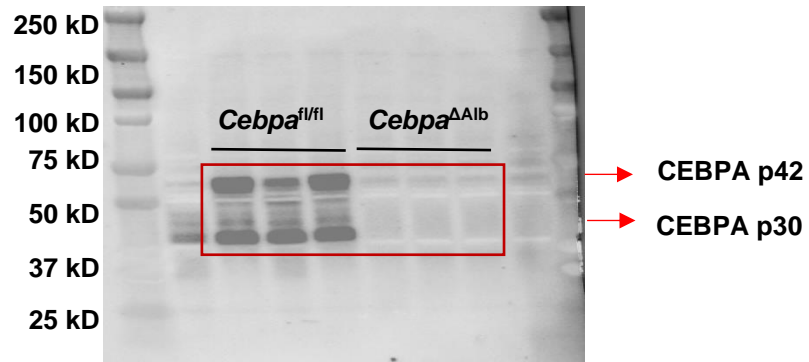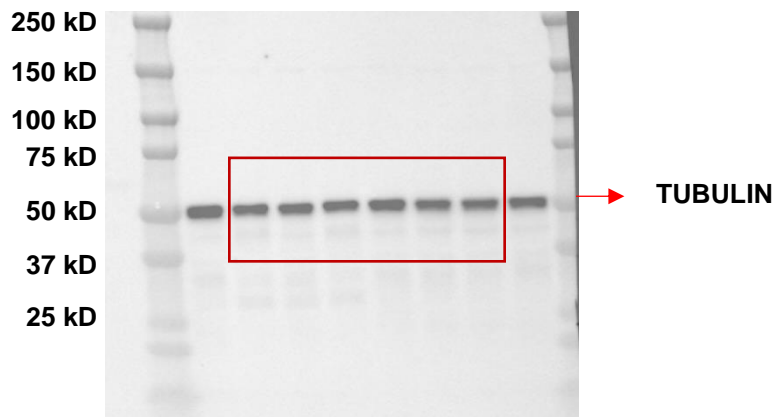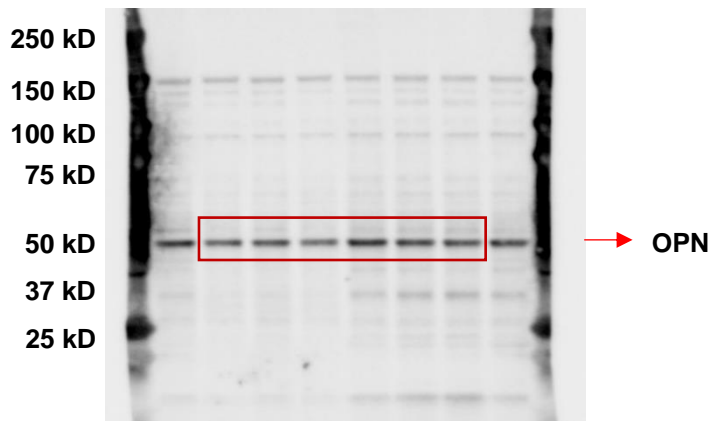

**G**

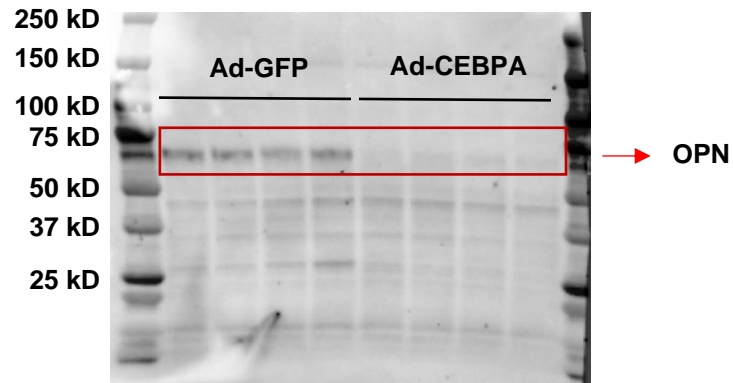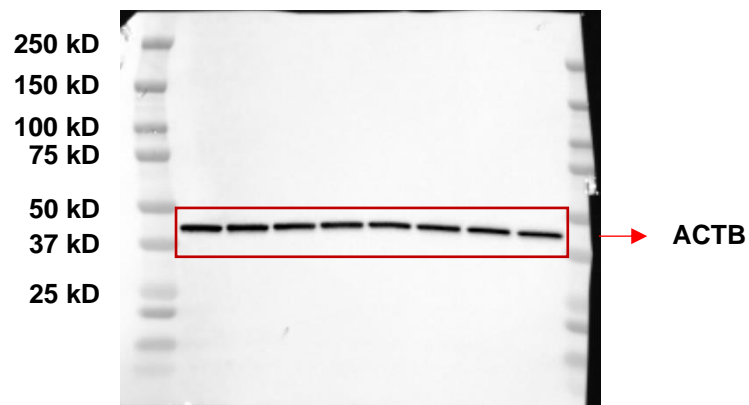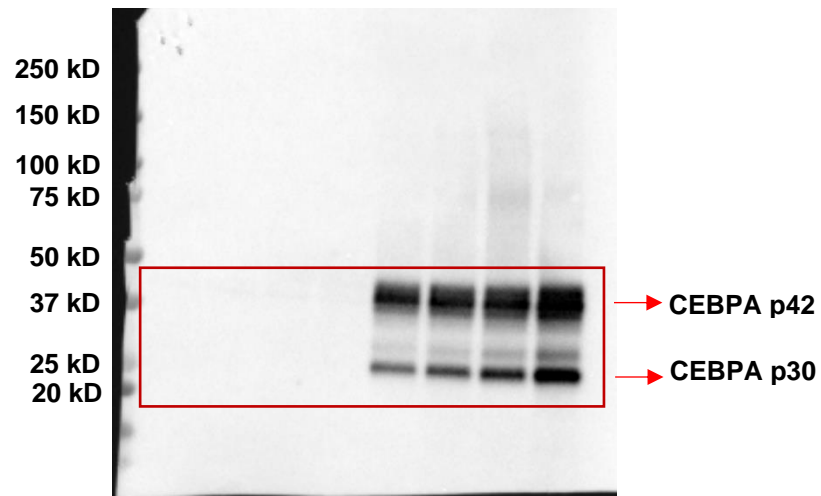



H

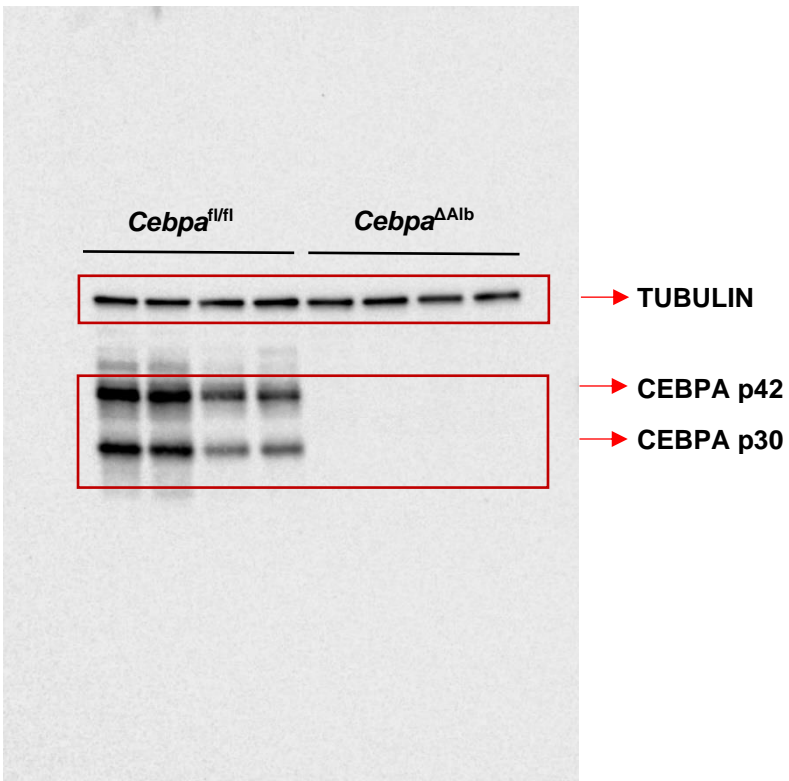

I

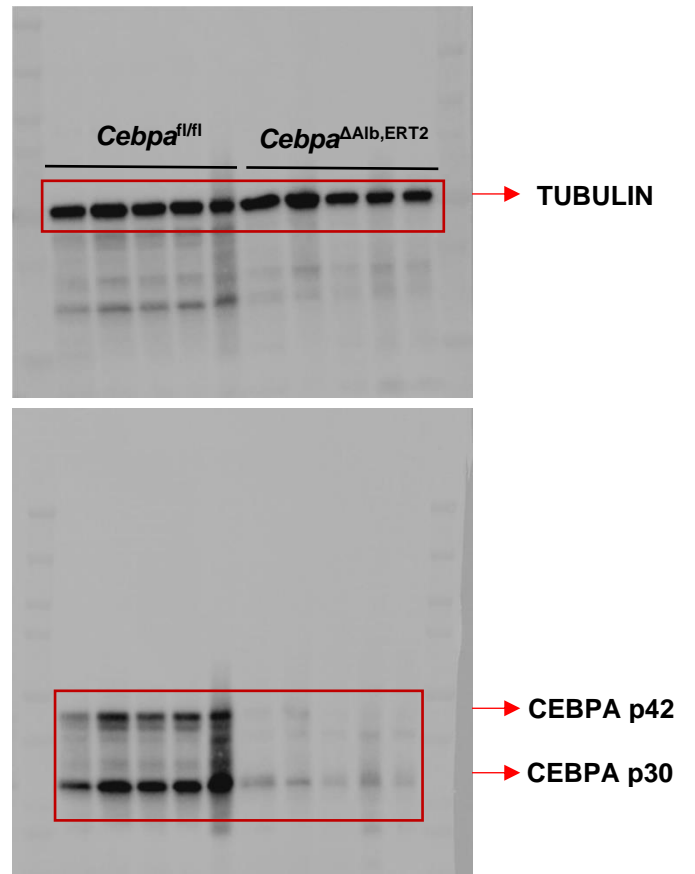

J

HFCFD 2W

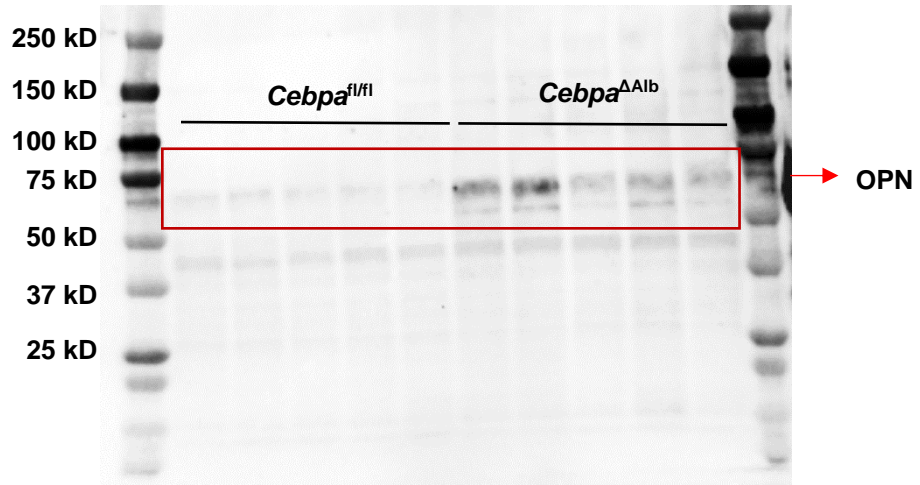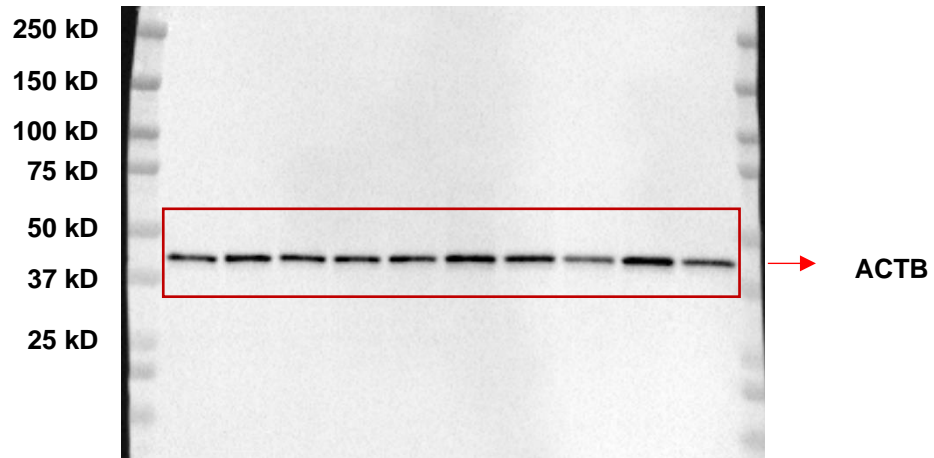

**K**

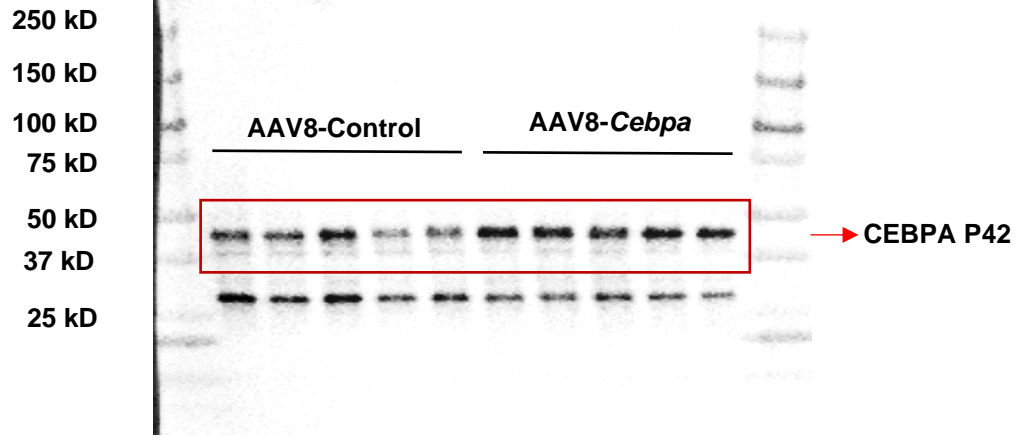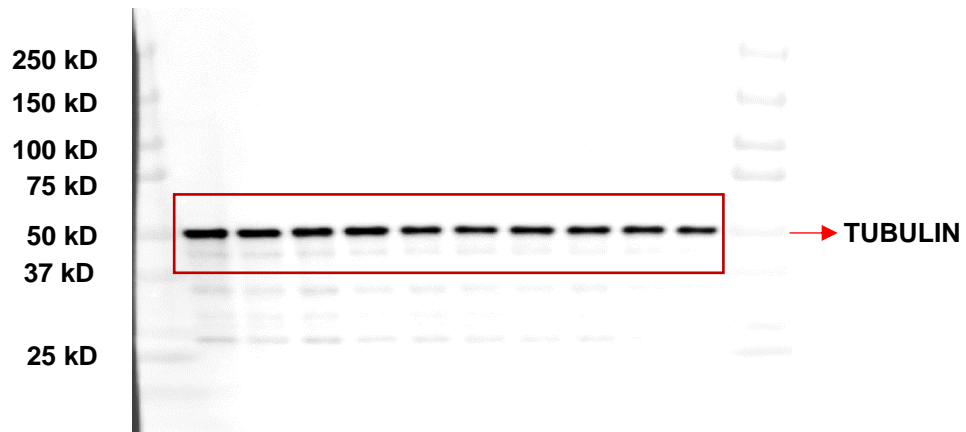

L

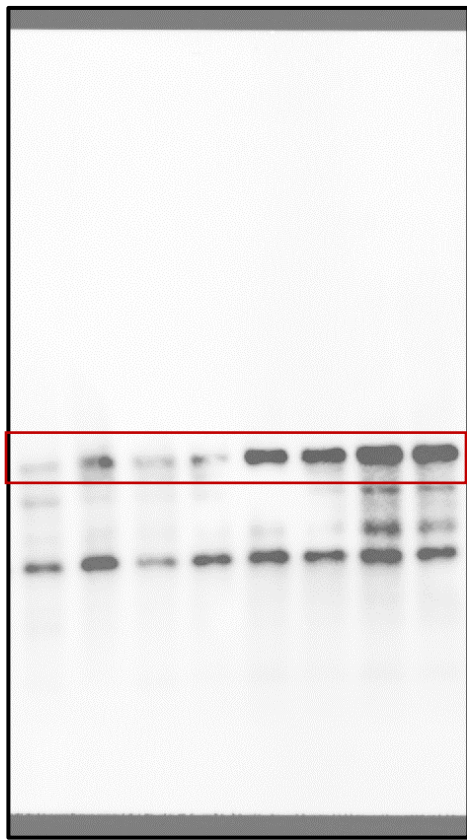

→ CEBPA p42

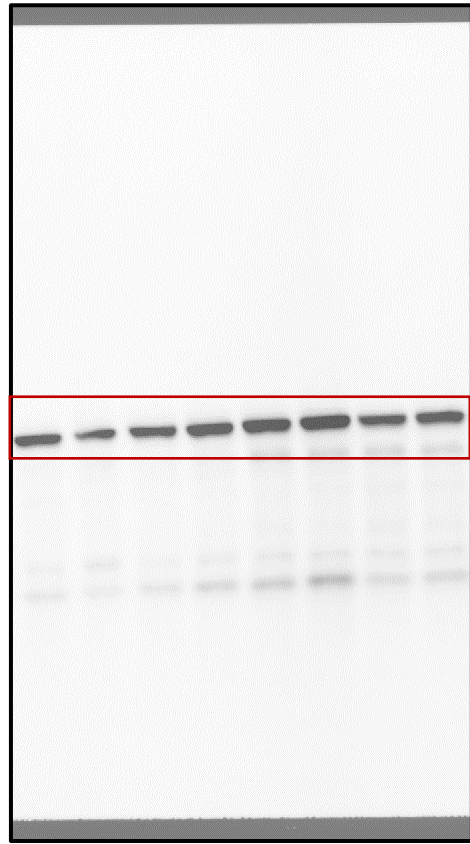

→ TUBULIN

M

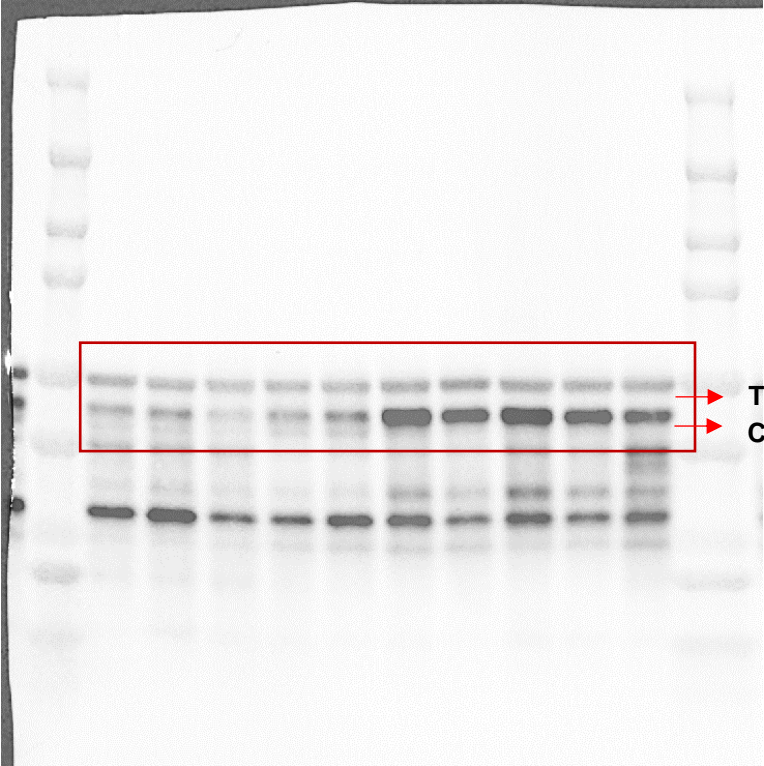

TUBULIN  
CEBPA p42
